# Supplementary material for: Agricultural mechanisation could reduce global labour requirements by hundreds of millions of agri-food workers
Source: Research Square preprint supplement (doi:10.21203/rs.3.rs-1344105/v1), 2022-02-22
Supplement: Supplementary file 1 [file 667fce42219f12dc82f21b84.pdf]

1 Supplementary material for:

2 **Agricultural mechanisation could reduce global labour**  
3 **requirements by hundreds of millions of agri-food workers**

4

5 Yiorgos Vittis<sup>1,2,4\*</sup>, Charles Godfray<sup>1,3</sup> and Michael Obersteiner<sup>2,4</sup>

6 <sup>1</sup>Oxford Martin Programme on the Future of Food, University of Oxford, OX3 7LF Oxford, United  
7 Kingdom

8 <sup>2</sup>School of Geography and the Environment, Environmental Change Institute, University of Oxford,  
9 OX1 3QY Oxford, United Kingdom

10 <sup>3</sup>Department of Zoology, University of Oxford, South Parks Road, Oxford OX1 3PS, UK

11 <sup>4</sup>Ecosystem Services and Management Program, International Institute for Applied Systems Analysis,  
12 Luxemburg, Austria

13

14 \* Corresponding Author - Email address: vittis@iiasa.ac.at

15

16 Contents

17

18 Tables ..... 3

19 Figures..... 7

20 Texts ..... 17

21

22

23

24

25

26

27

28

29

30

31

32

33

34

35

36

37

38

39

40

41

42

43

44

45

46

## 47 Tables

48

49 **Table 1 a-b. a Technological-use catching up of crop production systems by the different field size classes in the increased mechanisation scenarios.** In the incremental  
50 change scenario (MDA<sub>INCRE</sub>), each class is matched with the next, larger field size class (except for “Large” which remains the same). In the very fast transition scenario  
51 (MDA<sub>INCRE</sub>), all classes are matched with the highest labour productivity class (which here corresponds to the “Large” field size). The development here includes only the  
52 labour requirements and not the actual field sizes b Mechanisation development of livestock production systems. In the realistic scenario (MDA<sub>INCRE</sub>) livestock systems are  
53 catching up with the next more labour-productive class within the same agroecological zone group. Here we group together i. LILC and EILI (including Africa and South Asia)  
54 and ii. HIHC and EXHC (comprising the Americas, Eurasia and Australia). EILI and EXHC have the highest labour productivity in the respective agroecological zone group and  
55 thus, the requirements remain the same as the future requirements of the already efficient systems are not presently modelled. For the very fast transition scenario  
56 (MDA<sub>VFST</sub>), livestock classes are matched with the highest labour productivity cluster globally (which here corresponds to EXHC).

57 a

| Scenario             | Cropland field size classification |        |        |       |
|----------------------|------------------------------------|--------|--------|-------|
| Current              | Very Small                         | Small  | Medium | Large |
| MDA <sub>INCRE</sub> | Small                              | Medium | Large  | Large |
| MDA <sub>VFST</sub>  | Large                              | Large  | Large  | Large |

58 b

| Scenario             | Livestock production system classification |      |      |      |
|----------------------|--------------------------------------------|------|------|------|
| Current              | LILC                                       | EILI | EXHC | HIHC |
| MDA <sub>INCRE</sub> | EILI                                       | EILI | EXHC | EXHC |
| MDA <sub>VFST</sub>  | EXHC                                       | EXHC | EXHC | EXHC |

59

60

61

62

63

64 **Table 2 Crop production labour requirement inventory.** Values represent the labour requirement expressed in full time workers per hectare.

| Field size | Country                                          | Barley  | Groundnut | Maize   | Potato  | Sugar beet | Rice    | Sunflower | Sorghum | Soybean | Wheat   | Rapeseed | Millet  | Source link                                                                                                                                                                                                                                                                                                                                                                                             |
|------------|--------------------------------------------------|---------|-----------|---------|---------|------------|---------|-----------|---------|---------|---------|----------|---------|---------------------------------------------------------------------------------------------------------------------------------------------------------------------------------------------------------------------------------------------------------------------------------------------------------------------------------------------------------------------------------------------------------|
| large      | Canada                                           | 0.00186 |           |         |         |            |         | 0.00186   |         | 0.00199 | 0.00199 |          | 0.00199 | <a href="https://open.alberta.ca/dataset/098d9b7f-d52d-4f13-bfc6-3faccee86c53/resource/66074170-45bd-4d72-89f0-6c5f68e16979/download/af-2019-cost-return-benchmarks-crops-forages-dryland-2021-01.pdf">https://open.alberta.ca/dataset/098d9b7f-d52d-4f13-bfc6-3faccee86c53/resource/66074170-45bd-4d72-89f0-6c5f68e16979/download/af-2019-cost-return-benchmarks-crops-forages-dryland-2021-01.pdf</a> |
| large      | Canada                                           |         |           | 0.00169 |         |            |         |           |         |         |         | 0.00169  |         | <a href="https://www1.agric.gov.ab.ca/\$department/deptdocs.nsf/all/bus15031/\$file/potential-for-grain-corn-sm.pdf?OpenElement">https://www1.agric.gov.ab.ca/\$department/deptdocs.nsf/all/bus15031/\$file/potential-for-grain-corn-sm.pdf?OpenElement</a>                                                                                                                                             |
| large      | Canada                                           |         |           |         | 0.02273 |            |         |           |         |         |         |          |         | <a href="https://www.gov.mb.ca/agriculture/business-and-economics/financial-management/pubs/cop_crop_irrigatedpotato.pdf">https://www.gov.mb.ca/agriculture/business-and-economics/financial-management/pubs/cop_crop_irrigatedpotato.pdf</a>                                                                                                                                                           |
| large      | Canada                                           |         |           |         |         | 0.00453    |         |           |         |         |         |          |         | <a href="https://open.alberta.ca/publications/1927-9272">https://open.alberta.ca/publications/1927-9272</a>                                                                                                                                                                                                                                                                                             |
| large      | Italy<br>(originally<br>in small<br>field size)* |         |           |         |         |            | 0.02297 |           |         |         |         |          |         | <a href="https://ec.europa.eu/agriculture/rica/pdf/sa0301_rice.pdf">https://ec.europa.eu/agriculture/rica/pdf/sa0301_rice.pdf</a>                                                                                                                                                                                                                                                                       |
| medium     | UK                                               |         |           |         | 0.02682 | 0.01091    |         | 0.00364   |         |         |         | 0.00382  |         | <a href="https://www.thepocketbook.co.uk/">https://www.thepocketbook.co.uk/</a>                                                                                                                                                                                                                                                                                                                         |
| medium     | UK,<br>Slovakia                                  | 0.01188 |           |         |         |            |         |           | 0.01126 |         |         |          | 0.01126 | <a href="https://ec.europa.eu/agriculture/rica/pdf/cereal_report_2013_final.pdf">https://ec.europa.eu/agriculture/rica/pdf/cereal_report_2013_final.pdf</a>                                                                                                                                                                                                                                             |
| medium     | France                                           |         | 0.05161   |         |         |            |         |           |         |         | 0.01074 |          |         | <a href="https://ec.europa.eu/agriculture/rica/pdf/sa0401_nuts.pdf">https://ec.europa.eu/agriculture/rica/pdf/sa0401_nuts.pdf</a><br><a href="https://ec.europa.eu/agriculture/rica/pdf/cereal_report_2013_final.pdf">https://ec.europa.eu/agriculture/rica/pdf/cereal_report_2013_final.pdf</a>                                                                                                        |
| medium     | Spain                                            |         |           |         |         |            | 0.04762 |           |         |         |         |          |         | <a href="https://ec.europa.eu/agriculture/rica/pdf/sa0301_rice.pdf">https://ec.europa.eu/agriculture/rica/pdf/sa0301_rice.pdf</a>                                                                                                                                                                                                                                                                       |
| medium     | Germany                                          |         |           |         |         |            |         |           |         |         |         | 0.00367  |         | <a href="https://daten.ktbl.de/vrpflanzen/home.action">https://daten.ktbl.de/vrpflanzen/home.action</a>                                                                                                                                                                                                                                                                                                 |
| medium     | Bulgaria,<br>Slovakia                            |         |           | 0.01962 |         |            |         |           |         |         |         |          |         | <a href="https://ec.europa.eu/agriculture/rica/pdf/cereal_report_2013_final.pdf">https://ec.europa.eu/agriculture/rica/pdf/cereal_report_2013_final.pdf</a>                                                                                                                                                                                                                                             |
| medium     | Brazil                                           |         |           |         |         |            |         |           |         | 0.00541 |         |          |         | <a href="https://wwf.panda.org/wwf_news/?73900/Facts-about-soy-production-and-the-Basel-Criteria-En-Fr-Sp-Por-De-It">https://wwf.panda.org/wwf_news/?73900/Facts-about-soy-production-and-the-Basel-Criteria-En-Fr-Sp-Por-De-It</a>                                                                                                                                                                     |
| small      | Austria,<br>Greece                               | 0.02016 |           | 0.04145 |         |            |         |           | 0.02167 |         | 0.02113 |          | 0.02167 | <a href="https://ec.europa.eu/agriculture/rica/pdf/cereal_report_2013_final.pdf">https://ec.europa.eu/agriculture/rica/pdf/cereal_report_2013_final.pdf</a>                                                                                                                                                                                                                                             |



|            |                         |         |         |         |         |         |         |         |         |         |         |         |         |                                                                                                                                                                                                                                                                                                                                                                                                                                                                                                                                                                                                                                                                                                                                                                                                                                                                                                                                                                                                                                                                                                           |
|------------|-------------------------|---------|---------|---------|---------|---------|---------|---------|---------|---------|---------|---------|---------|-----------------------------------------------------------------------------------------------------------------------------------------------------------------------------------------------------------------------------------------------------------------------------------------------------------------------------------------------------------------------------------------------------------------------------------------------------------------------------------------------------------------------------------------------------------------------------------------------------------------------------------------------------------------------------------------------------------------------------------------------------------------------------------------------------------------------------------------------------------------------------------------------------------------------------------------------------------------------------------------------------------------------------------------------------------------------------------------------------------|
| small      | Austria, Greece         |         |         |         | 0.06256 | 0.06256 |         |         |         |         |         |         |         | <a href="https://agridata.ec.europa.eu/extensions/DashboardFarmEconomyFocusCrops/DashboardFarmEconomyFocusCrops.html">https://agridata.ec.europa.eu/extensions/DashboardFarmEconomyFocusCrops/DashboardFarmEconomyFocusCrops.html</a> (Type of farming: Specialist other field crops)                                                                                                                                                                                                                                                                                                                                                                                                                                                                                                                                                                                                                                                                                                                                                                                                                     |
| small      | Austria                 |         |         |         |         |         |         | 0.00349 |         |         |         | 0.00345 |         | <a href="https://idb.agrarforschung.at/default.html">https://idb.agrarforschung.at/default.html</a>                                                                                                                                                                                                                                                                                                                                                                                                                                                                                                                                                                                                                                                                                                                                                                                                                                                                                                                                                                                                       |
| small      | Greece                  |         | 0.18571 |         |         |         |         |         |         |         |         |         |         | <a href="https://ec.europa.eu/agriculture/rica/pdf/sa0401_nuts.pdf">https://ec.europa.eu/agriculture/rica/pdf/sa0401_nuts.pdf</a>                                                                                                                                                                                                                                                                                                                                                                                                                                                                                                                                                                                                                                                                                                                                                                                                                                                                                                                                                                         |
| small      | Greece, Italy, Portugal |         |         |         |         |         | 0.06364 |         |         |         |         |         |         | <a href="https://ec.europa.eu/agriculture/rica/pdf/sa0301_rice.pdf">https://ec.europa.eu/agriculture/rica/pdf/sa0301_rice.pdf</a>                                                                                                                                                                                                                                                                                                                                                                                                                                                                                                                                                                                                                                                                                                                                                                                                                                                                                                                                                                         |
| small      | Serbia                  |         |         |         |         |         |         |         |         | 0.01332 |         |         |         | <a href="https://www.researchgate.net/profile/Biserka-Komnenic-2/publication/312121573_The_agricultural_knowledge_and_information_system_research_and_technology_adoption_in_Serbian_agricultural_sector_pp_276-293_In_THEMATIC_PROCEEDINGS_EMERGING_TECHNOLOGIES_AND_THE_DEVELOPMENT_OF_AGRICULTURE/links/5870251408ae6eb871bf83c4/The-agricultural-knowledge-and-information-system-research-and-technology-adoption-in-Serbian-agricultural-sector-pp-276-293-In-THMATIC-PROCEEDINGS-EMERGING-TECHNOLOGIES-AND-THE-DEVELOPMENT-OF-AGRI.pdf#page=214">https://www.researchgate.net/profile/Biserka-Komnenic-2/publication/312121573_The_agricultural_knowledge_and_information_system_research_and_technology_adoption_in_Serbian_agricultural_sector_pp_276-293_In_THEMATIC_PROCEEDINGS_EMERGING_TECHNOLOGIES_AND_THE_DEVELOPMENT_OF_AGRICULTURE/links/5870251408ae6eb871bf83c4/The-agricultural-knowledge-and-information-system-research-and-technology-adoption-in-Serbian-agricultural-sector-pp-276-293-In-THMATIC-PROCEEDINGS-EMERGING-TECHNOLOGIES-AND-THE-DEVELOPMENT-OF-AGRI.pdf#page=214</a> |
| very small | India                   | 0.18081 | 0.28569 | 0.24127 | 0.38782 | 0.38782 | 0.29454 | 0.12672 | 0.17355 | 0.14773 | 0.15354 | 0.17656 | 0.20798 | <a href="https://eands.dacnet.nic.in/Cost_of_Cultivation.htm">https://eands.dacnet.nic.in/Cost_of_Cultivation.htm</a>                                                                                                                                                                                                                                                                                                                                                                                                                                                                                                                                                                                                                                                                                                                                                                                                                                                                                                                                                                                     |

65 \* Rice labour requirement taken from Italy: although it is in the small field size class, it demonstrates the most labour productive system across EU rice farms.

66 **Table 3 Livestock production labour requirement inventory.**

| Livestock Cluster Typology | Country   | Dairy cattle | Meat cattle | Dairy sheep and goats | Meat sheep and goats | Pig     | Meat Poultry | Eggs poultry | Source link                                                                                                                                                                 |
|----------------------------|-----------|--------------|-------------|-----------------------|----------------------|---------|--------------|--------------|-----------------------------------------------------------------------------------------------------------------------------------------------------------------------------|
| HIHC                       | UK        | 0.015        | 0.005       |                       | 0.00182              | 0.00091 | 0.00002      | 0.00006      | <a href="https://www.thepocketbook.co.uk/">https://www.thepocketbook.co.uk/</a>                                                                                             |
| HIHC                       | Spain     |              |             | 0.004                 |                      |         |              |              | <a href="https://www.sciencedirect.com/science/article/pii/S0022030214004342">https://www.sciencedirect.com/science/article/pii/S0022030214004342</a>                       |
| EXHC                       | Australia | 0.010        | 0.002       |                       | 0.00065              | 0.00025 | 0.000016     | 0.00004      | <a href="https://www.agriculture.gov.au/abares/research-topics/surveys/farm-survey-data">https://www.agriculture.gov.au/abares/research-topics/surveys/farm-survey-data</a> |
| EXHC                       | China     | 0.144        | 0.047       |                       | 0.01975              | 0.00699 | 0.00013      | 0.00053      | <a href="http://www.stats.gov.cn/tjsj/tjcbw/202008/t20200824_1785455.html">http://www.stats.gov.cn/tjsj/tjcbw/202008/t20200824_1785455.html</a>                             |
| EILI                       | Syria     |              |             |                       | 0.02359              |         |              |              | <a href="https://www.sciencedirect.com/science/article/pii/S0921448810000842">https://www.sciencedirect.com/science/article/pii/S0921448810000842</a>                       |
| EILI                       | Pakistan  |              |             |                       |                      |         | 0.00006      |              | <a href="https://www.sciencedirect.com/science/article/pii/S1658077X17302497">https://www.sciencedirect.com/science/article/pii/S1658077X17302497</a>                       |

|      |              |         |         |  |  |          |  |         |                                                                                                                                                                                                                                                                                                                                                                                                                                                                                                                                                                                                                                                                                           |
|------|--------------|---------|---------|--|--|----------|--|---------|-------------------------------------------------------------------------------------------------------------------------------------------------------------------------------------------------------------------------------------------------------------------------------------------------------------------------------------------------------------------------------------------------------------------------------------------------------------------------------------------------------------------------------------------------------------------------------------------------------------------------------------------------------------------------------------------|
| EILI | Vietnam      |         |         |  |  | 0.02     |  |         | <a href="http://www.tandfonline.com/doi/abs/10.1080/08974430802157606">http://www.tandfonline.com/doi/abs/10.1080/08974430802157606</a>                                                                                                                                                                                                                                                                                                                                                                                                                                                                                                                                                   |
| EILI | Thailand     |         |         |  |  |          |  | 0.00002 | <a href="https://www.semanticscholar.org/paper/Production-Efficiency-of-Broiler-Farming-in-A-Todsadee-Kameyama/114d7cb990c31f21f124a42f2bfae82405db3fbe">https://www.semanticscholar.org/paper/Production-Efficiency-of-Broiler-Farming-in-A-Todsadee-Kameyama/114d7cb990c31f21f124a42f2bfae82405db3fbe</a>                                                                                                                                                                                                                                                                                                                                                                               |
| EILI | South Africa | 0.07266 |         |  |  |          |  |         | <a href="http://www.tandfonline.com/doi/abs/10.1080/03031851003798686">http://www.tandfonline.com/doi/abs/10.1080/03031851003798686</a>                                                                                                                                                                                                                                                                                                                                                                                                                                                                                                                                                   |
| EILI | South Africa | 0.0509  |         |  |  |          |  |         | <a href="https://link.springer.com/article/10.1007/s11250-008-9288-1">https://link.springer.com/article/10.1007/s11250-008-9288-1</a>                                                                                                                                                                                                                                                                                                                                                                                                                                                                                                                                                     |
| LILC | Nigeria      |         |         |  |  |          |  | 0.00027 | <a href="https://www.journalajaees.com/index.php/AJAEES/article/view/28237">https://www.journalajaees.com/index.php/AJAEES/article/view/28237</a>                                                                                                                                                                                                                                                                                                                                                                                                                                                                                                                                         |
| LILC | Nigeria      |         |         |  |  | 0.0150   |  |         | <a href="https://www.academia.edu/download/63239020/IJRR005020200508-92321-192u2bq.pdf">https://www.academia.edu/download/63239020/IJRR005020200508-92321-192u2bq.pdf</a>                                                                                                                                                                                                                                                                                                                                                                                                                                                                                                                 |
| LILC | Nigeria      |         | 0.07576 |  |  |          |  |         | <a href="https://www.researchgate.net/profile/Oluwafunmiso-Adeola-Olajide/publication/314031261_Technical_efficiency_of_beef_cattle_production_technologies_in_Nigeria_A_stochastic_frontier_analysis/links/5c8a17a592851c1df9401dd1/Technical-efficiency-of-beef-cattle-production-technologies-in-Nigeria-A-stochastic-frontier-analysis.pdf">https://www.researchgate.net/profile/Oluwafunmiso-Adeola-Olajide/publication/314031261_Technical_efficiency_of_beef_cattle_production_technologies_in_Nigeria_A_stochastic_frontier_analysis/links/5c8a17a592851c1df9401dd1/Technical-efficiency-of-beef-cattle-production-technologies-in-Nigeria-A-stochastic-frontier-analysis.pdf</a> |
| LILC | Bangladesh   |         |         |  |  |          |  | 0.00094 | <a href="https://doi.org/10.1080/00036846.2011.581216">https://doi.org/10.1080/00036846.2011.581216</a>                                                                                                                                                                                                                                                                                                                                                                                                                                                                                                                                                                                   |
| LILC | Ghana        |         |         |  |  | 0.075968 |  |         | <a href="https://www.sciencedirect.com/science/article/pii/S1871141317300896#bib51">https://www.sciencedirect.com/science/article/pii/S1871141317300896#bib51</a>                                                                                                                                                                                                                                                                                                                                                                                                                                                                                                                         |
| LILC | Uganda       | 0.04855 |         |  |  |          |  |         | <a href="https://www.scirp.org/html/5-7201029_58393.htm?pagespeed=noscript">https://www.scirp.org/html/5-7201029_58393.htm?pagespeed=noscript</a>                                                                                                                                                                                                                                                                                                                                                                                                                                                                                                                                         |
| LILC | Botswana     |         | 0.03421 |  |  |          |  |         | <a href="https://www.tandfonline.com/doi/pdf/10.1080/03768350802212121">https://www.tandfonline.com/doi/pdf/10.1080/03768350802212121</a>                                                                                                                                                                                                                                                                                                                                                                                                                                                                                                                                                 |

## Figures

69

70 **Fig. 1 Relationship between cropland field size and a. technological adoption (measured by number of tractors in use), b.**  
71 **GDP per capita in current US dollars.**

72 **a**

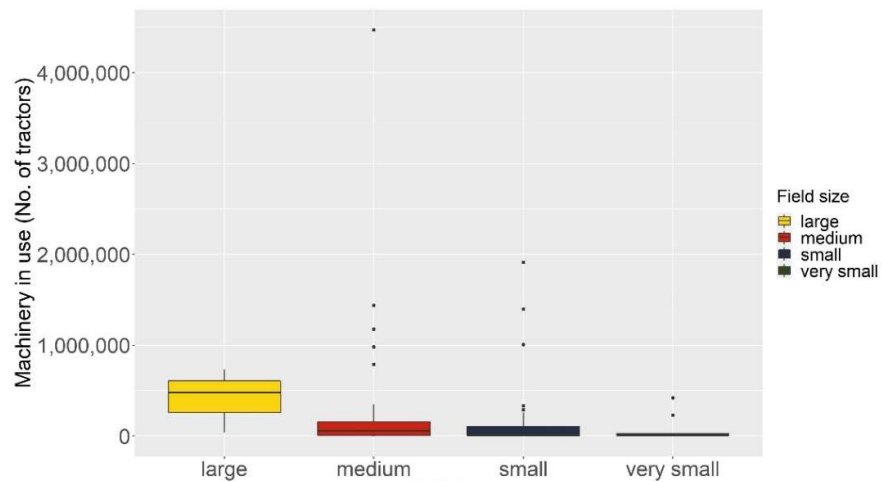

73

74 **b**

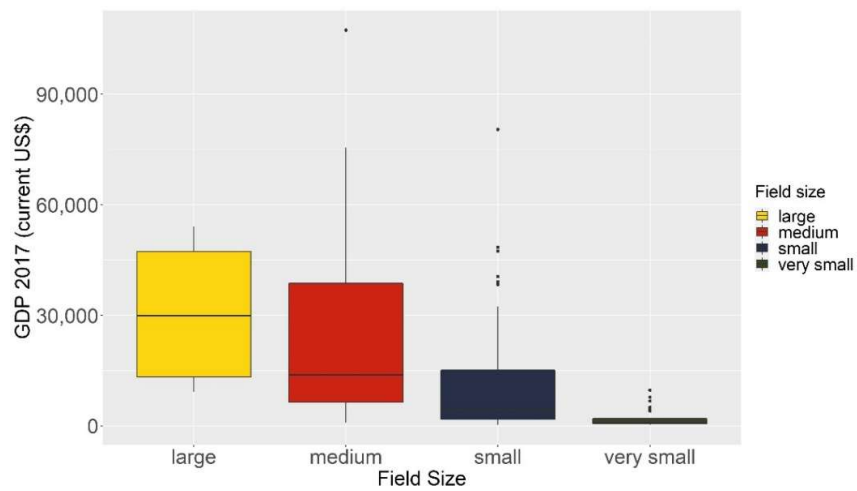

75

76

77

78

79

80

81

82

83

84 **Fig. 2 Agricultural workers per hectare of cropland by field size class.** Data points represent the different countries and  
 85 the corresponding number of people employed in agriculture (ILOSTAT) per hectare of cropland (FAOSTAT) for the year  
 86 2013.

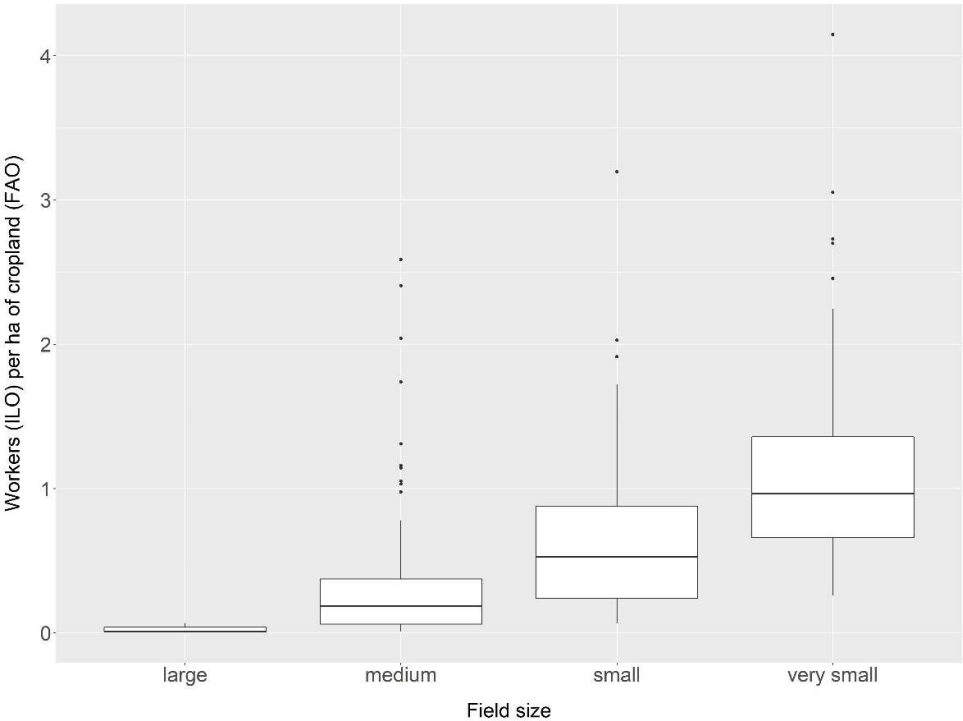

87  
88

89 **Fig. 3 Livestock systems cluster typology.** Clustering of countries based on similar attributes relating to the role of  
 90 livestock, society and the country's economy (adopted from Herrero et al. 2020). The four global livestock system clusters  
 91 include: (i) high income countries with high inputs of production and high levels of consumption (HIHC); (ii) low- and  
 92 middle-income countries with low inputs of production and low levels of productivity and consumption (LILC); (iii) low-,  
 93 middle- and high-income countries with higher livestock consumption and extensive grazing areas (EXHC); and (iv) low- and  
 94 middle-income countries with varying livestock consumption and emerging importance of livestock (EILI).

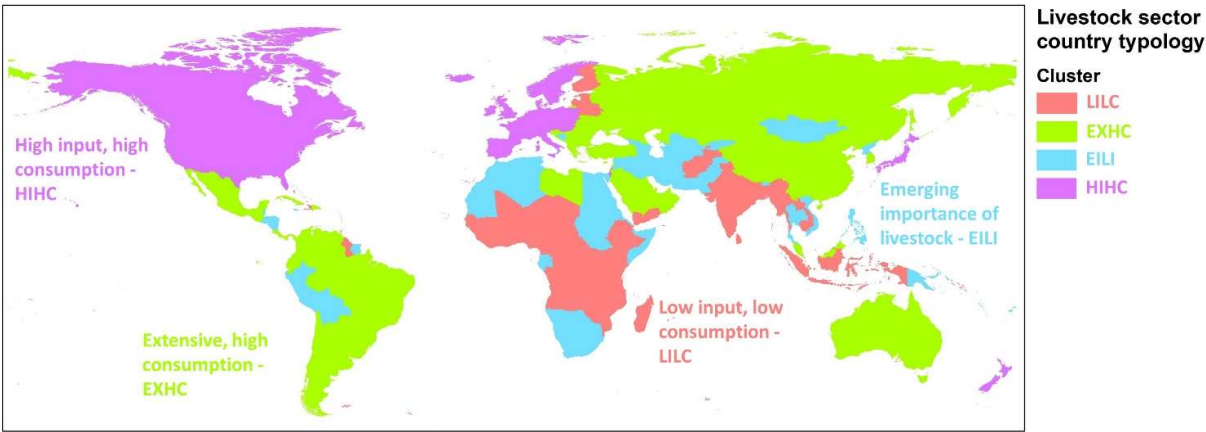

95  
96  
97  
98

**Fig. 4 Labour requirements a. for crop production (workers per hectare) by crop and field size class and b. for livestock production (workers per head) by livestock type and livestock system cluster.** These values are the aggregate (mean) labour requirements reported in the labour inventory (Table 1 and Table 2 above).

**a**

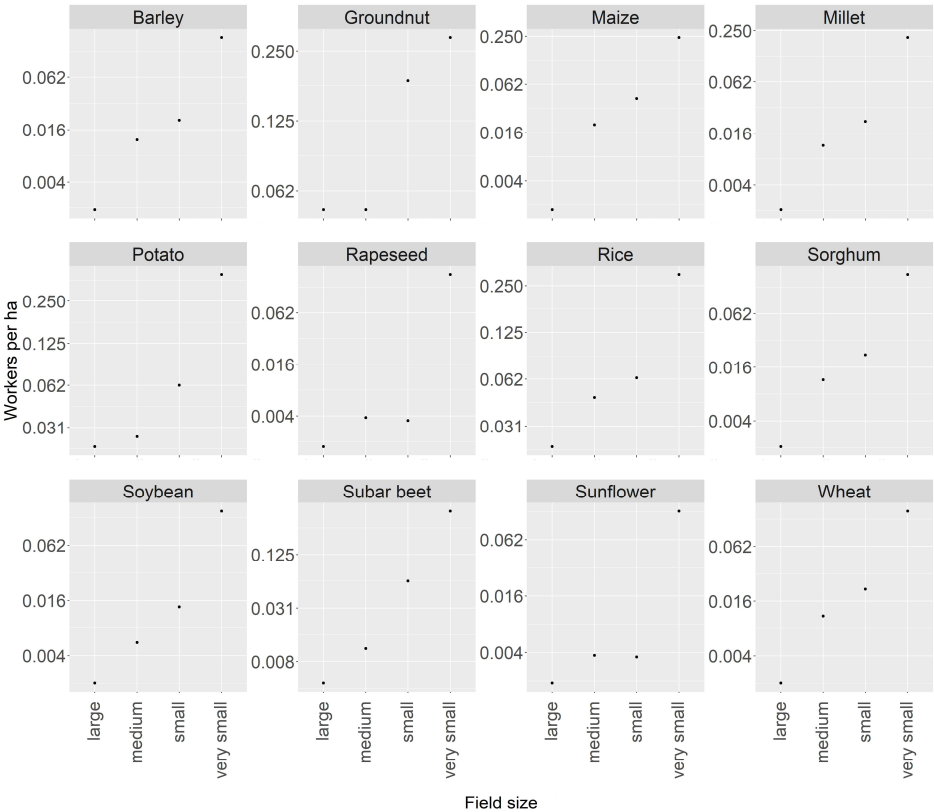

117 **b**

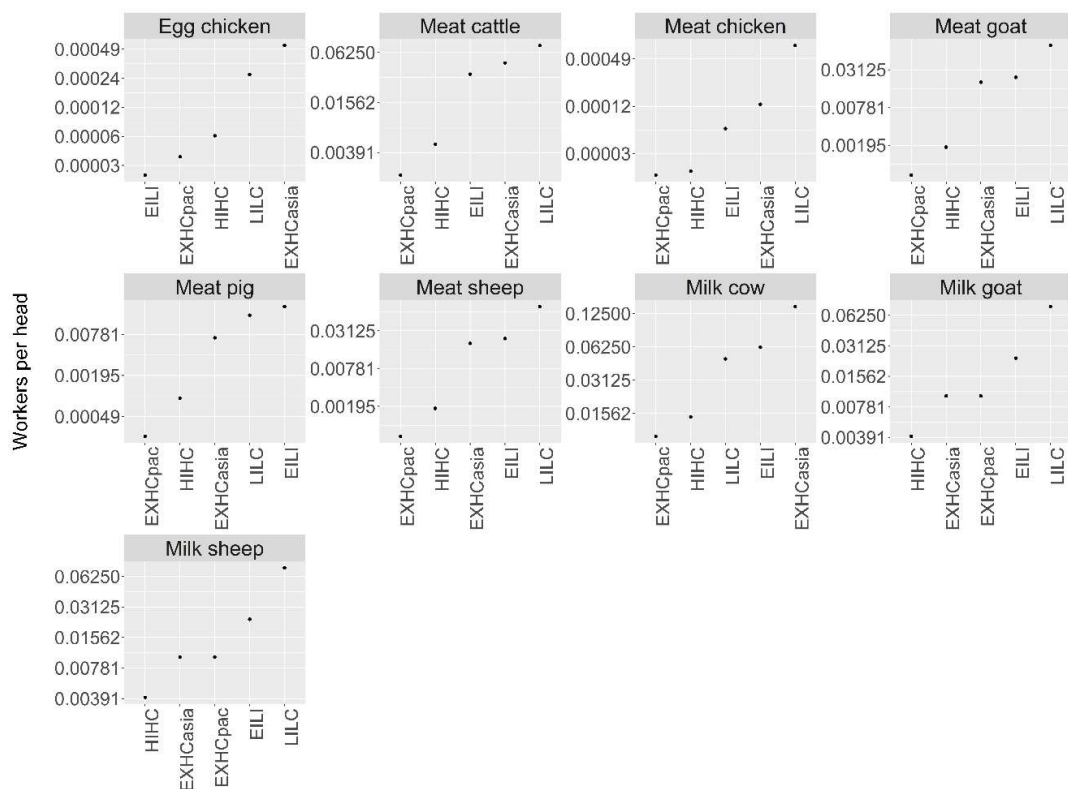

118

Livestock system cluster

119 **Fig. 5 Graphical representation of the relationship between field size, level of mechanisation and corresponding labour**  
120 **requirements in a. current state of agricultural labour and b. the pathway of this relationship following the**  
121 **mechanisation development potentials (Incremental and Very fast) across very small field size production systems.**

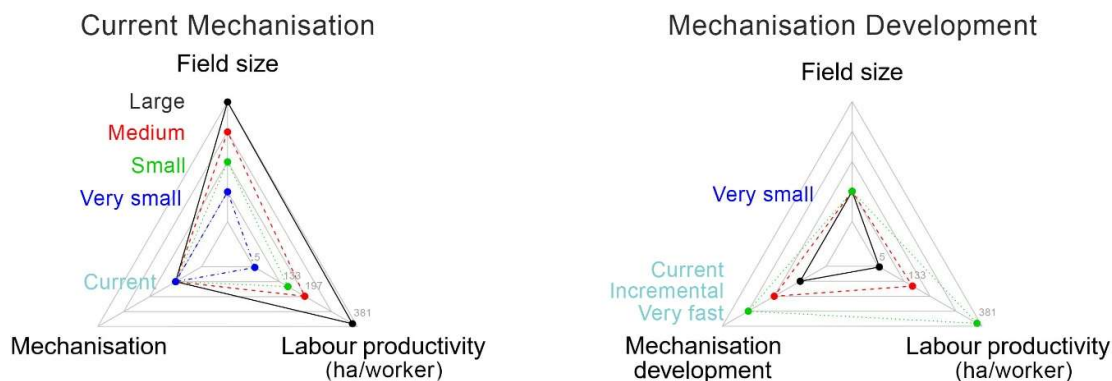

122

123

124

125

126

127

**Fig. 6 Total labour requirements (AWU) in the current and future agricultural mechanisation scenarios.** The facet on the right-hand side demonstrates the stacked bars of labour requirements in AWU in the current state of agricultural labour and the two static scenarios agricultural mechanisation development. The left-hand side displays in more detail the labour requirements in for the two static scenarios of structural change.

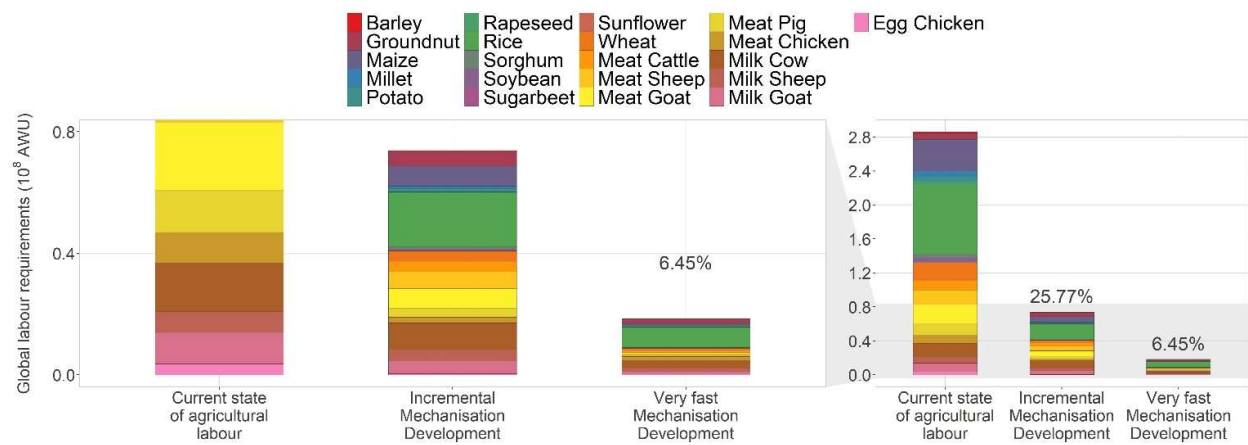

**Fig. 7 Rate of change in labour requirements in the current and future agricultural mechanisation scenarios.**

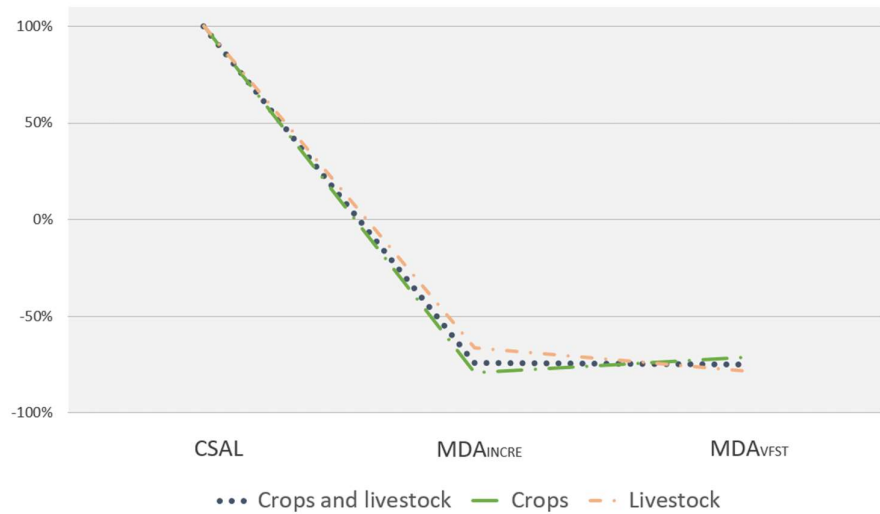

**Fig. 8 Fraction of potential agricultural labour release in each spatial pixel between current, incremental change and very fast transition of systems mechanisation.**

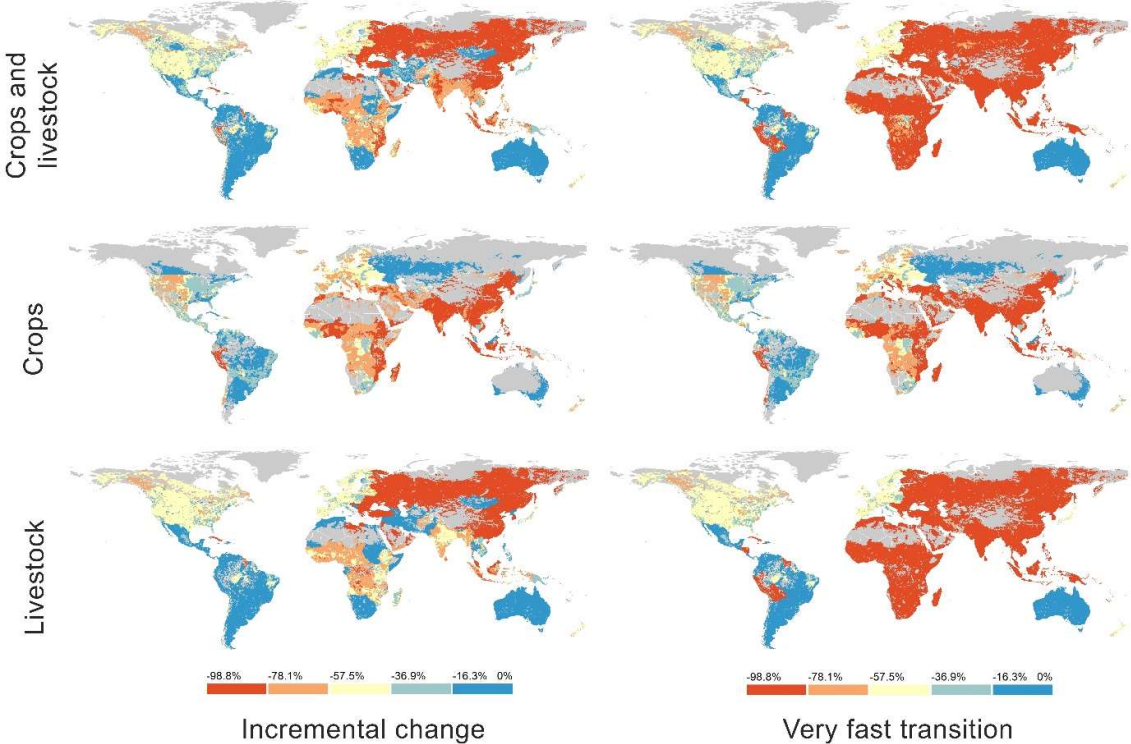



162

163 **Fig. 9 Calorie production per agricultural worker (Mcal per AWU) in the current state of agricultural sector**  
 164 **(CSAL) and the two what-if scenarios of mechanisation development (MDA<sub>INCRE</sub> and MDA<sub>VFST</sub>).**

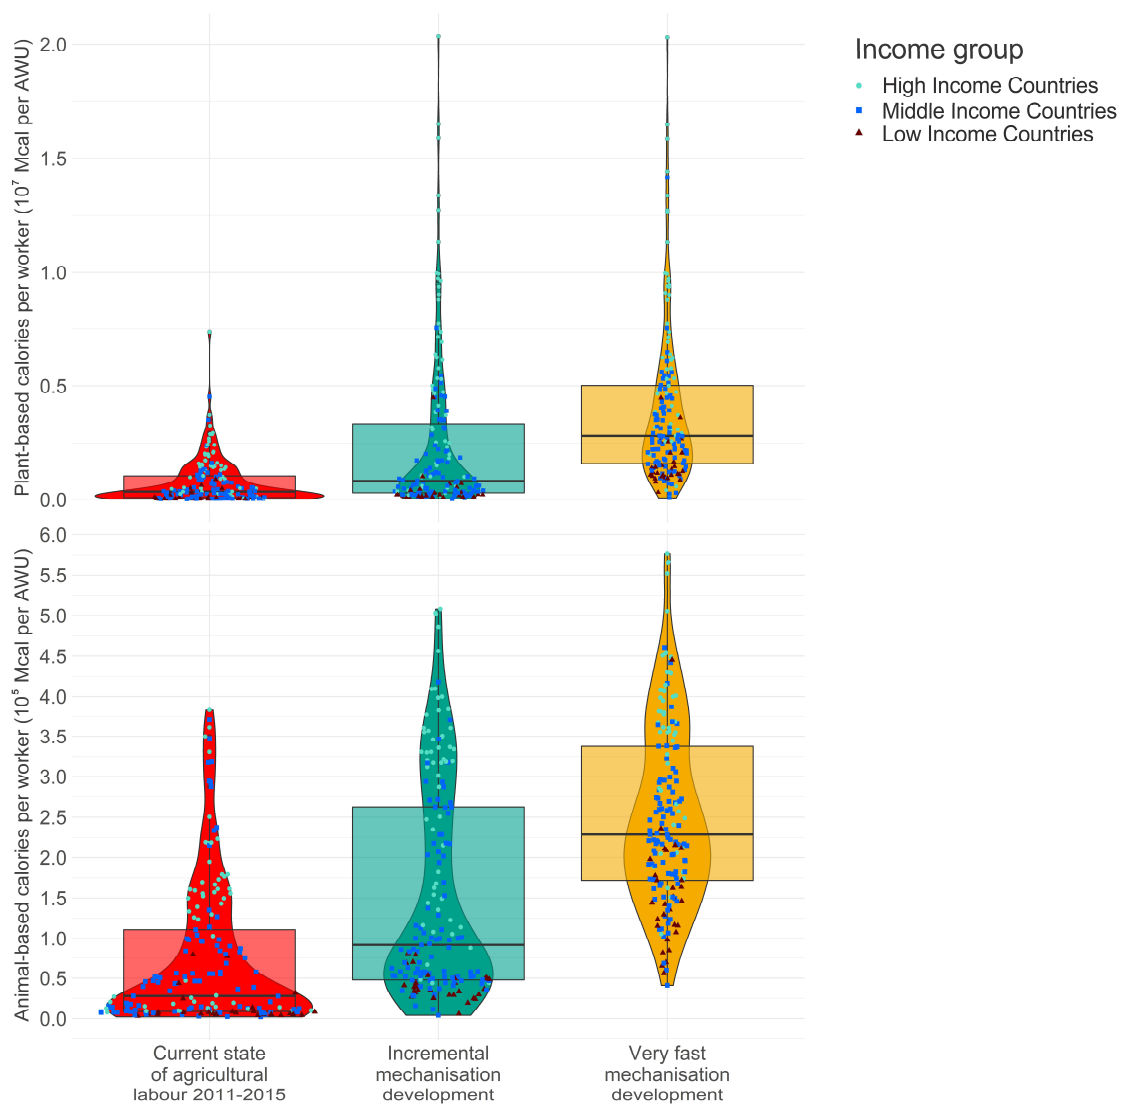

165

166

167

168

169

170

171

172

173

174

**Fig. 10 Protein production per agricultural worker (tonnes of protein per AWU) in the current state of agricultural sector (CSAL) and the two what-if scenarios of mechanisation development (MDA<sub>INCRE</sub> and MDA<sub>VFST</sub>).**

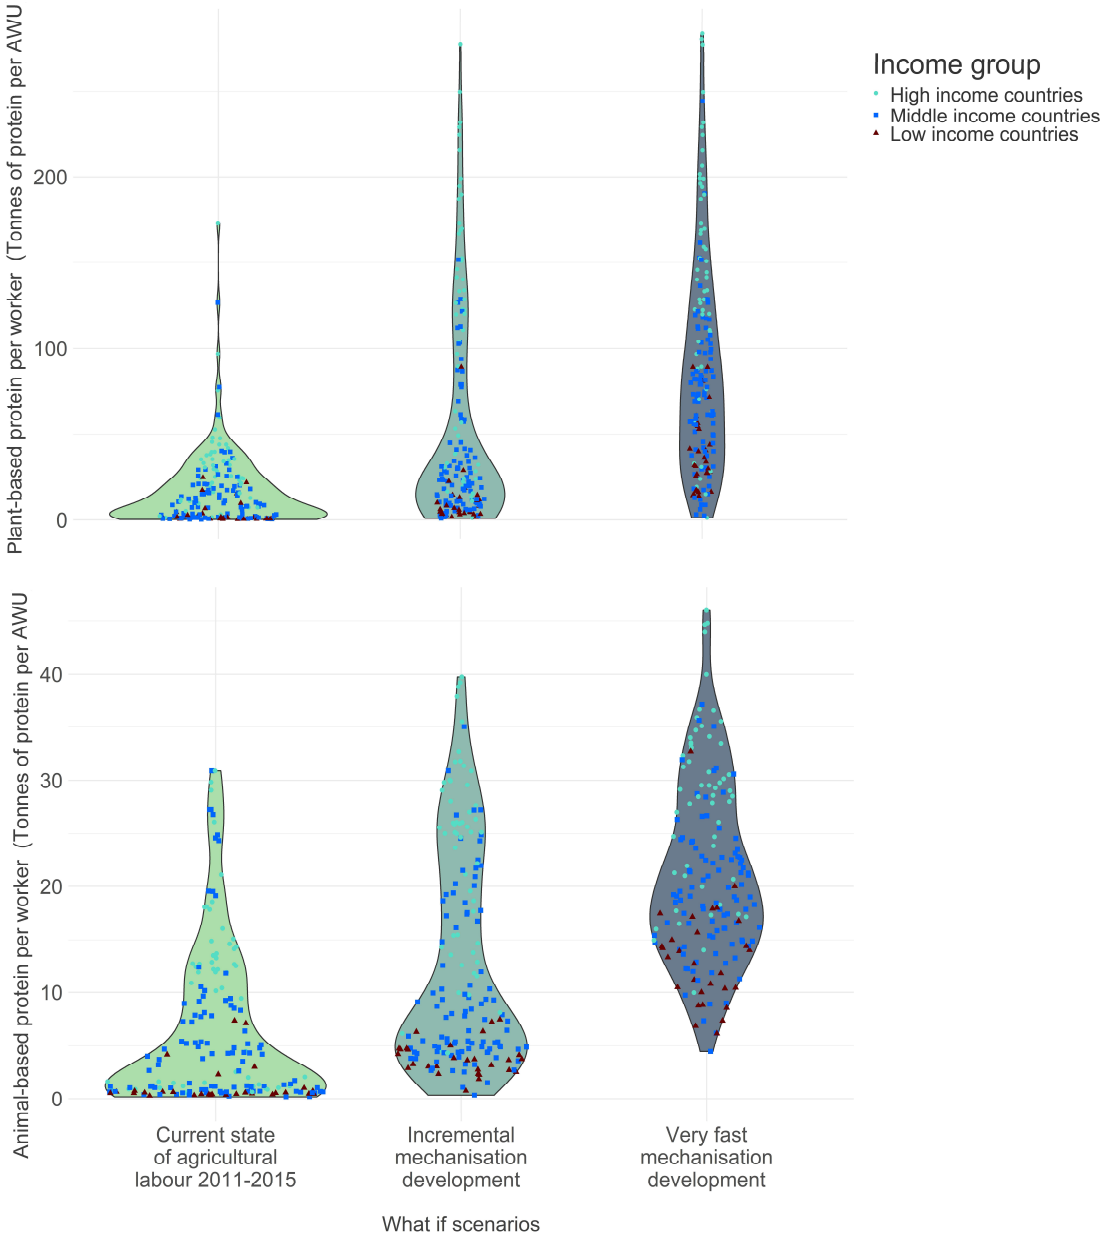

**Fig. 11 Evaluation of modelled labour requirement for cereal production (measured in AWU) against reported FADN labour inputs.**

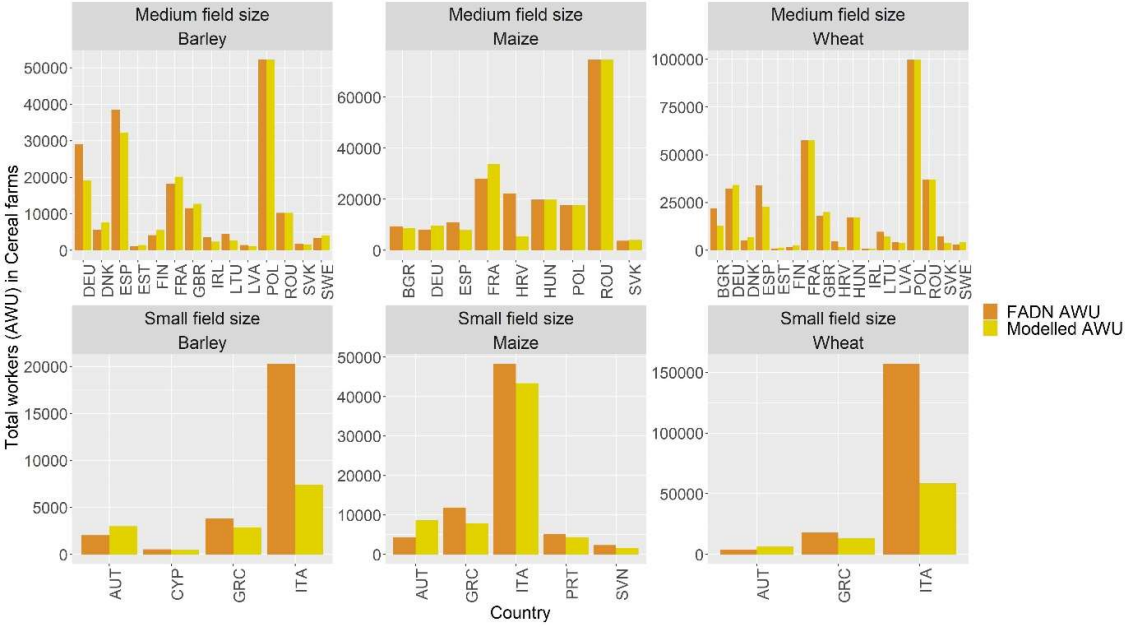

**Fig. 12 Evaluation of modelled labour requirement for cattle meat production (measured in AWU) against reported FADN labour inputs.**

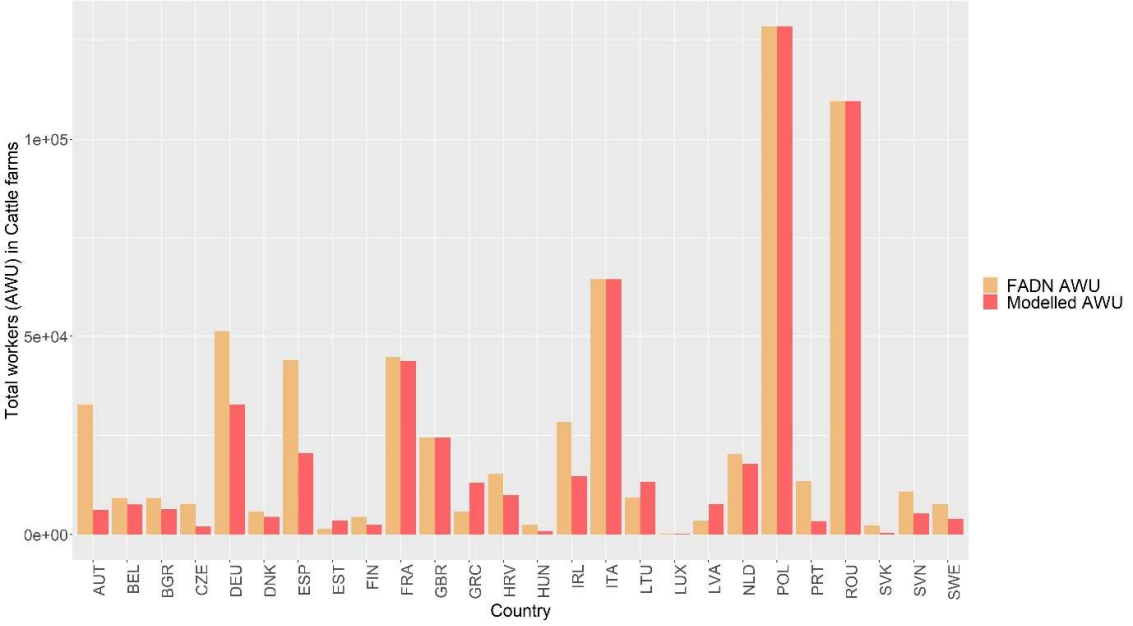

**Fig. 13 Evaluation of modelled labour requirement for cow's milk production (measured in AWU) against reported FADN labour inputs.**

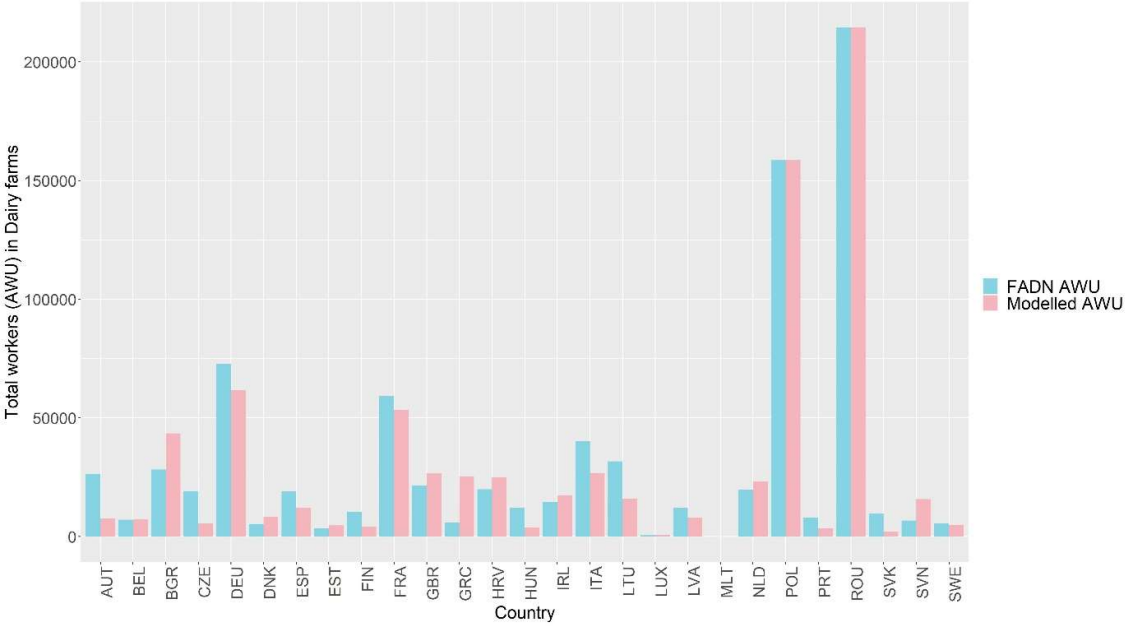

Texts

**Supplementary Text 1**

Developments in technological and labour productivity reflect already visible trends in global agricultural systems and go along differences in incomes and industrialisation<sup>1</sup>. Labour productivity (iso-curves) (hectares per agricultural worker – ha/worker) can be stimulated by a simultaneous increase of land productivity (production per unit of land – tonnes/ha) and land availability (hectares of cultivated land per agricultural worker – ha/worker) (Supplementary material, Fig. 14)<sup>2</sup>. Increased land productivity is achieved through intensification with higher production resulting from sufficient irrigation and fertilizers and greater land availability represents larger area of cultivated land per worker through “motorization” in which motors replace human and animal energy for the production processes (plough, spray, harvest etc.)<sup>2</sup>. In our baseline classification we identify very similar patterns of labour requirements in which lower technological adoption and land availability (here reflected by fewer motorised machineries, and smaller field sizes) relates to larger numbers of labourers required across poorer countries, and vice versa across richer countries (Supplementary material, Fig. 1 and Fig. 2). The latter provides support to the labour requirement inventory that we compile here as we identify the same trends linking land availability, technological adoption and labour productivity (Supplementary material, Fig. 4, Table 2 and Table 3).

**Fig. 14 Labour productivity pathways** (Figure adopted from Dorin et al. 2013, “A World without Farmers? The Lewis Path Revisited”).

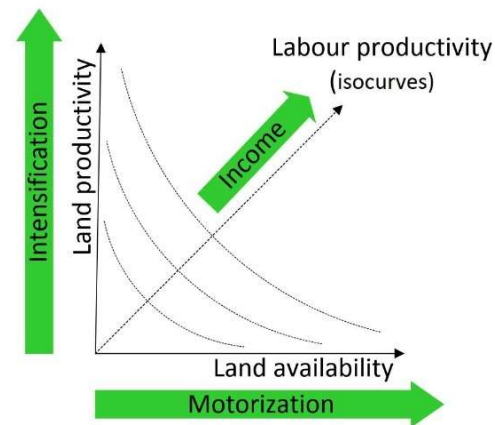

232 **References**

233

- 234 1. A World without Farmer? Food Production, Inclusive Development and Ecology: Historical  
235 Evidences for a New Deal (1961-2007). *Ecological Economics* **143**, 324–325 (2012).
- 236 2. Dorin, B., Hourcade, J. C. & Benoit-Cattin, M. A World without Farmers ? The Lewis Path  
237 Revisited. (2013).

238
